# Supplementary material for: Association of the circadian factor Period 2 to p53 influences p53's function in DNA-damage signaling
Source: PubMed Central journal article supplement — Mol Biol Cell. 2015 Jan 15;26(2):359–72. doi: 10.1091/mbc.E14-05-0994 (PMC4294682; doi:10.1091/mbc.e14-05-0994), 2015-01-15

# Supplemental Materials

*Molecular Biology of the Cell*

Gotoh et al.

## Supplemental Figures

FIGURE S1: A. The hp53/hPer2 complex is present in the nuclear compartment. HCT116 cells were transfected with pCS2+FLAG-hPer2 and total, cytosolic, and nuclear fractions (T, C, and N, respectively) were immunoprecipitated using  $\alpha$ -p53 antibody. Complex components were identified by immunoblotting using specific antibodies (*right panels*). Input samples are shown on *left panels*. Asterisk indicates a non-specific signal. B. Input controls of hPer2 and hp53 expressing proteins. HCT116 cells were transfected with pCS2+myc-hp53 and either pCS2+FLAG-hPer2 (+) or empty vector (-) and maintained in complete media for 20 h before adding, or not (control; -MG132), MG132 (50  $\mu$ M) and ubiquitin aldehyde (5 nM) as described in Fig. 4.D legend. Cells were maintained four additional hours before harvesting. Lysates equivalent to  $2.56 \times 10^4$  cells were used to prepare the cytosolic (C) and total (T) fractions whereas  $1.28 \times 10^4$  cells were used for nuclei (N) preparation. Protein expression was evaluated in total, cytosolic, and nuclear fractions and input amounts detected by immunoblotting using  $\alpha$ -Per2, -p53, -lamin A/C, and -tubulin antibodies. C. Input controls of hPer2 and Mdm2 expressing proteins. HCT116 cell lysates ( $3.5 \times 10^4$  cells for T/C;  $15.7 \times 10^4$  cells for N) from pCS2+3xFLAG-Mdm2 and pCS2+myc-hPer2 cotransfected cells treated, or not (control), with MG132 and ubiquitin aldehyde as described in Fig. 4.E legend, were analyzed for protein expression by immunoblotting using  $\alpha$ -p53 (*middle panel*), -FLAG, and -myc (*upper two panels*). In all experiments, lamin A/C and tubulin were used as loading controls for nuclear and cytoplasmic fractions, respectively (lower two panels).

FIGURE S2: *In vitro* transcribed and translated FLAG-hp53(ch)hPer2, FLAG-hp53(ch)GST, myc-Mdm2, and myc-hPer2 proteins were used for ubiquitination experiments. When indicated, myc-hPer2 and FLAG-hp53(ch)GST were pre-incubated, thus, the complex was formed before adding myc-Mdm2. For the FLAG-hp53(ch)hPer2 chimera, the translated protein and myc-Mdm2 were incubated together before the ubiquitination reaction took place. Ubiquitination was carried out as described in the “Materials and Methods” section. FLAG-tagged proteins were immunoprecipitated with  $\alpha$ -FLAG/protein A-beads and blotted using  $\alpha$ -ubiquitin antibody. Membranes were then stripped and re-probed with  $\alpha$ -p53 and -myc antibodies to detect complex bound proteins. Asterisk indicates IgG heavy chain. The figure shows immunoblot data from a single experiment that was repeated three times with similar results. Quantification of the sample’s ubiquitinated signal was performed using ImageJ Software v1.45 (*bar graph*). Statistical comparisons were evaluated by *t*-test. ##:  $p < 0.005$ .

FIGURE S3: Profile plots of signal intensity across H1299 cells transfected with myc-tagged forms of hp53, hp53(ch)GST, hp53(ch)hPer2(356-574/683-872), NLS-hp53(ch)GST, and NLS-hp53(ch)hPer2(356-574/683-872) (Figure 3, *panels i-v*), or the untagged form of hp53(ch)hPer2 (Figure 3, *panel vi*). Recombinant proteins (in red) and DNA levels (in blue) were scored along the white lines shown in each of the image panels located on the left. Fluorescence was visualized using a Nikon Eclipse TE2000-E microscope equipped with a Cascade II E2V CCD97 camera (Photometrics). Images were processed using NIS-Elements AR 3.0 Nikon software and quantified using ImageJ software v1.45.

FIGURE S4: A. *In vitro* association of Cry1 to hPer2/hp53 complex. *In vitro* transcribed and translated FLAG-hp53, FLAG-hPer2, myc-hp53, myc-hPer2, and myc-hCry1 proteins were pre-incubated as follows: FLAG-hp53 with either myc-hPer2 (ratio 1:2; lane 1) or myc-hCry1 (ratio 1:1; lane 2) and FLAG-hPer2 with either myc-hp53 or myc-hCry1 (ratio 2:1; lanes 3-4). Complexes were allowed to form by incubating the proteins at room temperature for 20 min. Immunoprecipitations were performed using  $\alpha$ -FLAG-conjugated beads followed by washing in NP40 lysis buffer. Associated proteins were detected by immunoblotting using  $\alpha$ -FLAG (*upper panel*) or  $\alpha$ -myc (*lower panel*) antibodies. In lanes 5-6,

complex of *myc*-hp53 with FLAG-hPer2 (ratio 1:2) or *myc*-hCry1 with FLAG-hPer2 (ratio 1:2) were formed by incubation at room temperature before adding *myc*-hCry1 or *myc*-hp53, respectively. Complexes were immunoprecipitated and analyzed as described above. FLAG- and *myc*-inputs are indicated in *top* and *right* panels. Asterisk indicates IgG heavy chain. B. Binding of hPer2 to hp53 prevents hp21 from being expressed. H1299 cells were transfected with pCS2+FLAG-hp53, -hp53(ch)GST, -hp53(ch)hPer2, or -hp53(ch)hPer2(356-574/683-872) and harvested 24 h later. Cell lysates (~40 µg) were resolved by SDS-PAGE and recombinant (*upper left* and *right panels*) and endogenous proteins (*middle* and *lower left* and *right panels*) detected by immunoblotting using α-p21, -p53, -FLAG, -tubulin antibodies.

FIGURE S5: H1299 cells (~ 8x10<sup>5</sup>) were transfected with empty vector, pCS2+FLAG-hp53, pCS2+FLAG-hp53(ch)GST, or hp53(ch)hPer2 and maintained for 24 h before irradiation (5 Gy). Samples were harvested every 12h for 3 days after treatment (t=0 before treatment) and analyzed for viability using a MTT viability assay (Abnova) following manufacturer's instructions. Absorbance was measured at OD<sub>570nm</sub> in a SPECTRA MAX 190 plate reader (Molecular Devices).

FIGURE S6: Expression levels of recombinant proteins in samples from experiments shown in Figures 5B (panel A) and S7E (panel B). In all cases, cell lysates (40 µg) were resolved by SDS-PAGE and recombinant proteins were detected by immunoblotting using an α-FLAG antibody (*upper panel*). Tubulin was used as the loading control (*lower panel*). EV: empty vector.

FIGURE S7: H1299 cells were transfected with either pCS2+FLAG-hp53, pCS2+FLAG-hp53(ch)GST, hp53(ch)hPer2, or empty vector (EV) and treated (+γ-IR), or not (-γ-IR), with different doses of radiation (0.5, 2.5, or 5 Gy). Cell lysates (50 µg) were collected 2 h after irradiation and proteins resolved by SDS-PAGE and blotted using an α-Chk1-Ser<sup>345</sup> antibody for phosphorylation in Ser<sup>345</sup> of endogenous Chk1 as described in the "Materials and Methods" section (*top panels*). Tubulin was used as the loading control (*lower panel*). Protein levels were quantified using ImageLab version 5.1 (Bio-Rad, *middle bar graph*) and values are represented as the mean ± SEM from three independent experiments. Real-time qRT-PCR data were normalized to the levels of expression in untreated empty vector. Data are presented as the mean ± SEM from three independent experiments performed in triplicate (*lower bar graph*). Statistical comparisons were done by *t-test*. NS: indicates not significant; #: indicates p≤0.02; ###: indicates p≤0.05.

FIGURE S8: H1299 cells were transfected with: *i*) empty vector (EV, A), *ii*) pCS2+FLAG-hp53 or pCS2+FLAG-hp53(ch)GST (B and C, respectively), or *iii*) pCS2+FLAG-hp53 or pCS2+FLAG-hp53(ch)hPer2(356-574/683-872) (D). Cells were treated (+γ-IR, A, C, D) or not (-γ-IR, A, B, D) with radiation and harvested as indicated in Fig. 6.A legend. Total RNA was purified using TRIzol and cDNA synthesized as described in the "Materials and Methods" section. Real-time qRT-PCR data were normalized to the levels of expression in untreated empty vector (A) or FLAG-hp53 transfected cells (B-D). Data are presented as the mean ± SEM from three independent experiments performed in triplicate. Statistical comparisons were done by either *two-tailed unpaired t-test* (A-C) or ANOVA using *Bonferroni* or *Games-Howell post-hoc* analyses when needed [D; SPSS; IBM Statistics]. NS: indicate not significant; #: indicates p≤0.05; ##: indicates p≤0.01; ###: indicates p≤0.001. E. H1299 cells were co-transfected with the reporter *hp21<sup>WAF1/CIP1</sup>-luc* construct cloned in pGL2 and pCS2+FLAG-hp53, pCS2+FLAG-hp53(ch)hPer2(356-574/683-872) or empty vector (~200 ng) plus pCMV-β-gal (~200 ng) as internal control. Extracts from cells treated (+γ-IR), or not (-γ-IR), with radiation were assayed for luciferase and β-galactosidase activities. The experiment was replicated thrice; error bars indicate SEM and data evaluated by ANOVA using *Bonferroni post-hoc* test [SPSS; IBM Statistics]. ##: indicates p<0.01; ###: indicates p<0.001. F. H1299 cells were transfected with either pCS2+FLAG-

hp53(ch)hPer2(356-574/683-872) or empty vector (EV) and treated (+ $\gamma$ -IR), or not (- $\gamma$ -IR), with radiation as indicated in Fig. 6.A and in the “Materials and Methods” section. Aliquots of lysates taken at different times (20  $\mu$ g) were resolved by SDS-PAGE and blotted using specific antibodies [ $\alpha$ -Chk1 and  $\alpha$ -p21 for endogenous Chk1 kinase and hp21<sup>WAF1/CIP1</sup>, respectively;  $\alpha$ -FLAG for FLAG-hp53(ch)hPer2(356-574/683-872);  $\alpha$ -Chk1-Ser<sup>345</sup> for phosphorylation in Ser<sup>345</sup> of endogenous Chk1, and  $\alpha$ -p53-Ser<sup>15</sup> for phosphorylation in Ser<sup>15</sup> in FLAG-hp53(ch)hPer2(356-574/683-872)]. Tubulin was used as loading control (*lower panel*). Asterisk indicates nonspecific signal.

FIGURE S9: A. HCT116 cells were transfected with either FLAG-hPer2 or siRNAhPer2 and collected at 24 and 48 h post-transfection, respectively. Empty vector (EV) and mock samples were controls. qRT-PCR data are presented as the mean  $\pm$  SEM from three independent experiments performed in triplicate. Statistical comparisons were done by *two-tailed unpaired t-test* and analyses performed using SPSS (IBM Statistics). NS: indicates not significant; ##: indicates  $p \leq 0.01$ . B. Lysates (250  $\mu$ g) from HCT116 cells transfected with either FLAG-hPer2 or empty vector were incubated with  $\alpha$ -Per2 antibody and protein A-beads in NP40 lysis buffer for immunodepletion. Unbound fraction (supernatants) were analyzed by immunoblotting using specific antibodies. C. H1299 cells were transfected with pCS2+FLAG-hPer2, pCS2+FLAG-hp53, empty vector (EV), or a combination of plasmids. Cells were harvested 24 h after transfection and aliquots were analyzed by immunoblotting and quantified using ImageLab version 5.1 (Bio-Rad). Data are presented as the mean  $\pm$  SEM from three independent experiments performed in triplicate.

FIGURE S10: A. HCT116 lysates ( $15 \times 10^5$  cells) from non-irradiated (-) or  $\gamma$ -IR (+, 10Gy) cells were used to prepare the cytosolic (C) and total (T) fractions whereas  $45 \times 10^5$  cells were used for nuclei (N) preparation. Endogenous proteins were identified in total, cytosolic, and nuclear fractions and input amounts detected by immunoblotting using  $\alpha$ -Per2, -p53, -lamin A/C, and -tubulin antibodies (*upper panels*). Total, cytosolic, and nuclear extracts were incubated with  $\alpha$ -Per2 antibody (0.7  $\mu$ g) and protein A-beads in NP40 lysis buffer for 3h at 4°C. Washed samples were analyzed by immunoblotting using specific antibodies. The figure shows immunoblot data from a single experiment that was repeated twice times with similar results. Increased levels of hp53 were expected in the nuclear fraction as result of stabilization and in response to  $\gamma$ -IR [for review see Kruse, (2009)]. B. HEK293 lysates (200  $\mu$ g) from pCS2+3xFLAG-Mdm2, pCS2+3xFLAG-hp53, and pCS2+myc-hPer2 cotransfected cells treated, or not (0 h), with 20 Gy of  $\gamma$ -IR were immunoprecipitated using  $\alpha$ -FLAG and protein A-beads. Immunoblotting was performed using specific antibodies to detect myc-hPer2 association and 3xFLAG-expressed proteins (*upper and lower panels*, respectively). Twenty  $\mu$ g of whole lysates were tested for protein expression levels and are shown on the left.

## Supplemental Material

### Table

**Table S1** *Primer sequences for qRT-PCR reactions.* Primers used throughout are summarized. Sequences were retrieved from their corresponding GeneBank accession number and primers designed using Beacon Design™ (Premierbiosoft) software.

**Table S1.** *Primer sequences for qRT-PCR reactions.*

| Gene           | Encoding Protein         |         | Primer Sequence 5'-3'      | GeneBank Accession Number |
|----------------|--------------------------|---------|----------------------------|---------------------------|
| <i>ACTB</i>    | β-actin                  | Forward | TCAGAAGGATTCTATGTGGGCGA    | NM_001101.3               |
|                |                          | Reverse | TTTCTCCATGTCGTCCAGTTGGT    |                           |
| <i>BAX</i>     | Bax                      | Forward | GTTGTCGCCCTTTTCTACTTTGCC   | NM_004324.3               |
|                |                          | Reverse | TGTCCAGCCCATGATGGTTCTGAT   |                           |
| <i>CLOCK</i>   | Clock                    | Forward | AGTTCAGCAACCATCTCAGGCTCA   | NM_004898.3               |
|                |                          | Reverse | TTGCTGGTGATGTGACTGAGGGAA   |                           |
| <i>CRY1</i>    | Cry1                     | Forward | ATCATTGGTGTGGACTAC         | NM_021117.3               |
|                |                          | Reverse | TCTGCTTCATTCGTTCA          |                           |
| <i>GADD45α</i> | Gadd45α                  | Forward | TGCTGGTGACGAACCCACATTCAT   | NM_001924.3               |
|                |                          | Reverse | CACCCACTGATCCATGTAGCGACTTT |                           |
| <i>GAPDH</i>   | GAPDH                    | Forward | CTCTGGTAAAGTGGATATTGT      | NM_002046.4               |
|                |                          | Reverse | GGTGGAATCATATTGGAACA       |                           |
| <i>MYC</i>     | c-myc                    | Forward | AGGAGACATGGTGAACCAGAGTTT   | NM_002467.4               |
|                |                          | Reverse | AGAAGCCGCTCCACATACAGTCCT   |                           |
| <i>PER2</i>    | Per2                     | Forward | TGAGAAGAAAGCTGTCCCTGCCAT   | NM_022817.2               |
|                |                          | Reverse | GACGTTTGCTGGGAACCTCGCATTT  |                           |
| <i>CDKN1α</i>  | p21 <sup>WAF1/CIP1</sup> | Forward | TCCAGCGACCTTCCTCATCCAC     | NM_000389.4               |
|                |                          | Reverse | TCCATAGCCTCTACTGCCACCATC   |                           |
| <i>TP53</i>    | p53                      | Forward | GCGTGTGGAGTATTTGGATGA      | NM_000546.5               |
|                |                          | Reverse | AGTGTGATGATGGTGAGGATGG     |                           |
| <i>NR1D1</i>   | Rev-erba                 | Forward | AGCATGACCAAGTCACCCTGCTTA   | NM_021724.3               |
|                |                          | Reverse | TGCGGCTTAGGAACATCACTGTCT   |                           |
| <i>TBP</i>     | Tbp                      | Forward | CACGAACCACGGCACTGATT       | NM_003194.4               |
|                |                          | Reverse | TTTTCTTGCTGCCAGTCTGGAC     |                           |
| <i>SFN</i>     | 14-3-3 σ                 | Forward | GCAAGACCGAGATTGAGG         | NM_006142.3               |
|                |                          | Reverse | TGTCACAGGGGAACTTTATTG      |                           |

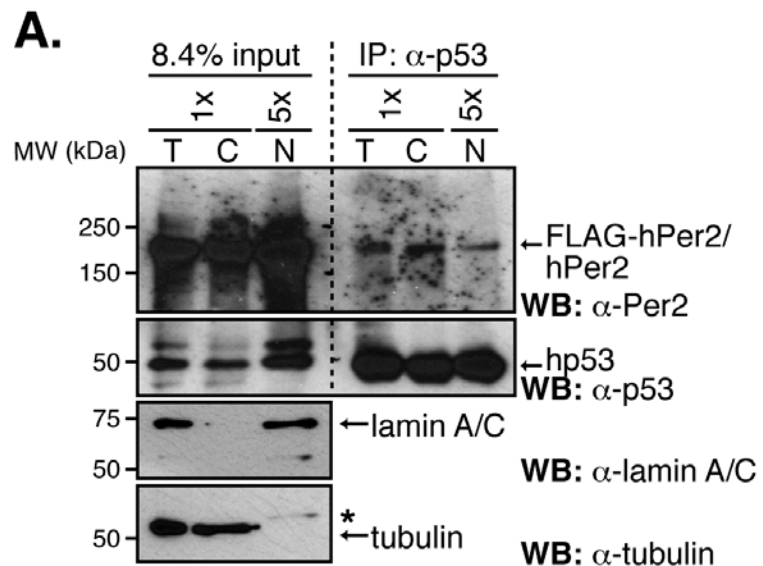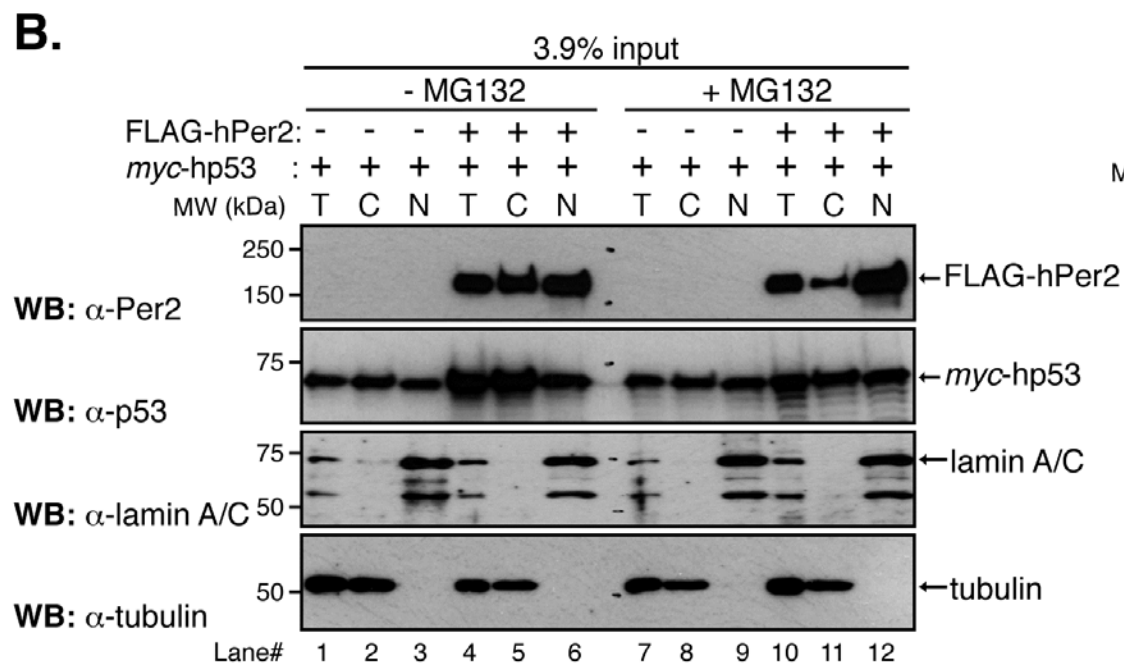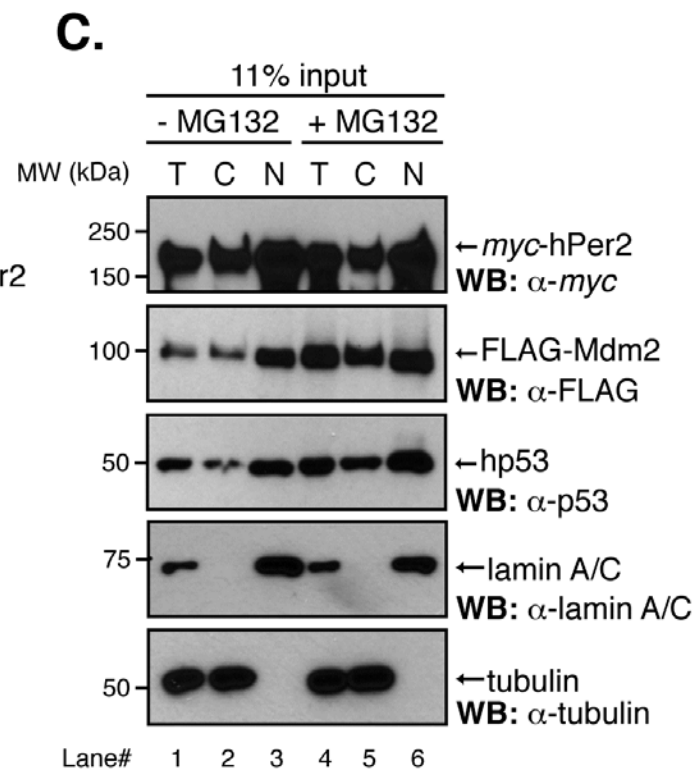



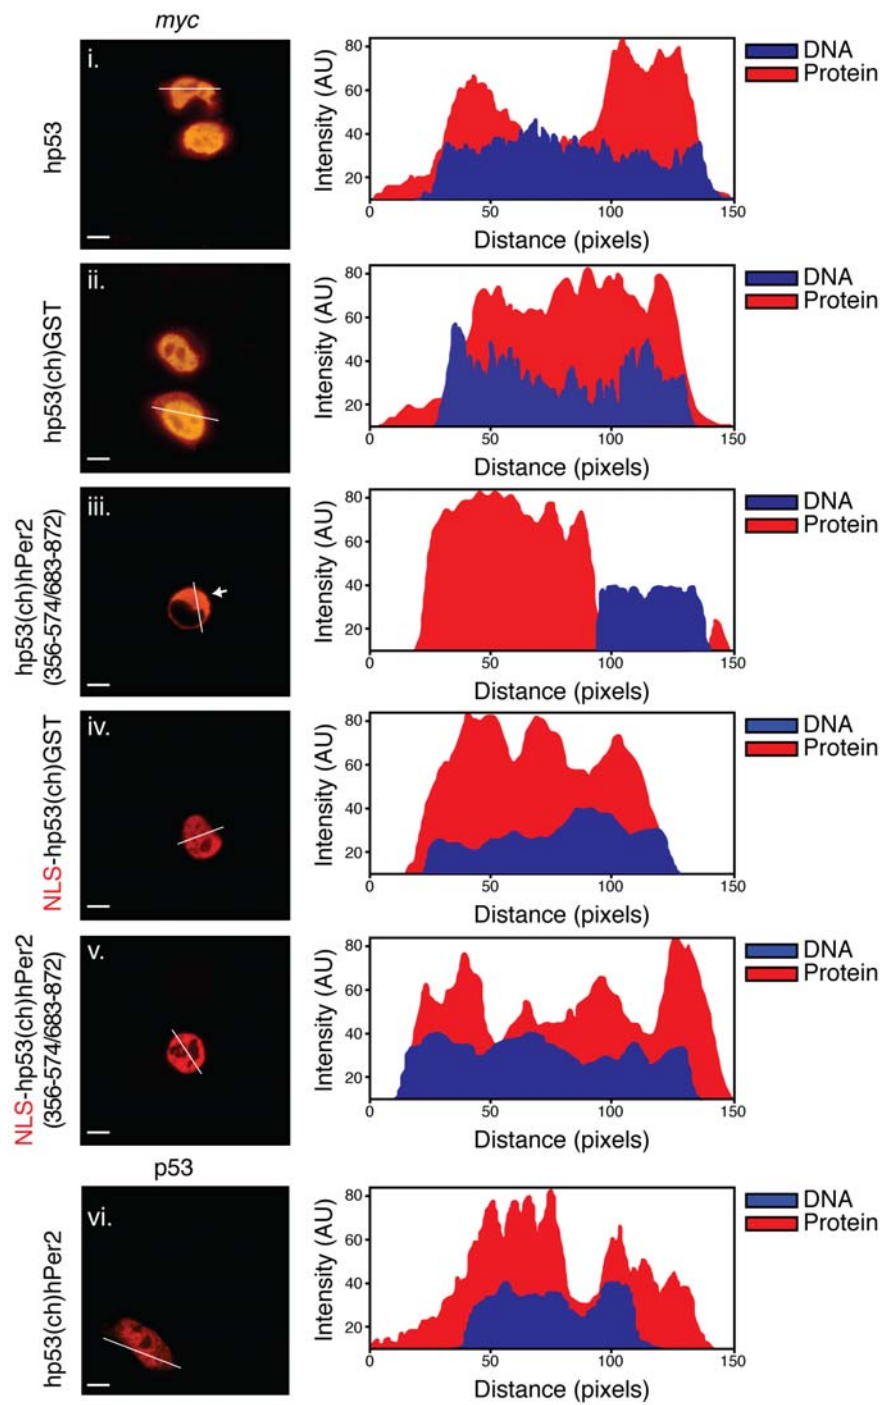



**A.**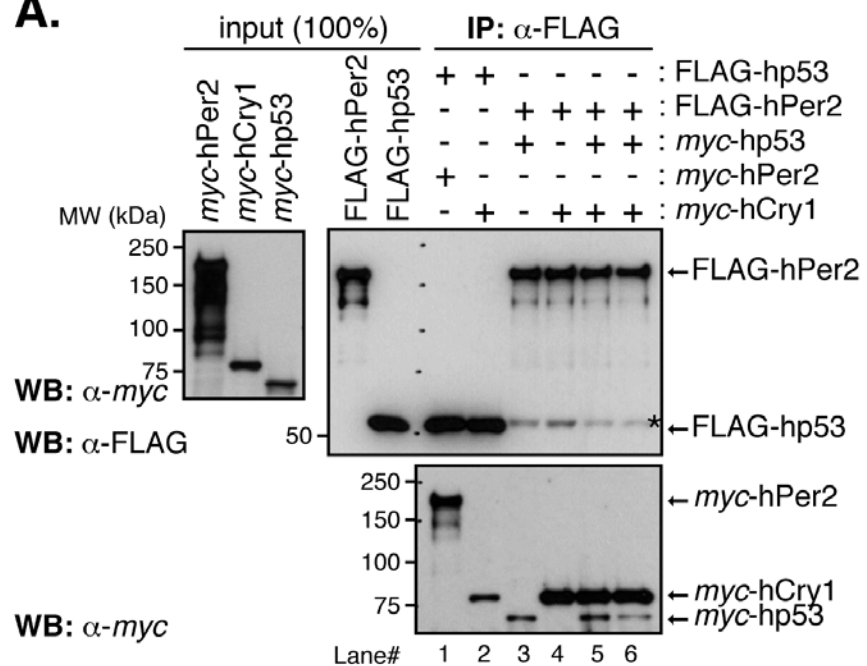**B.**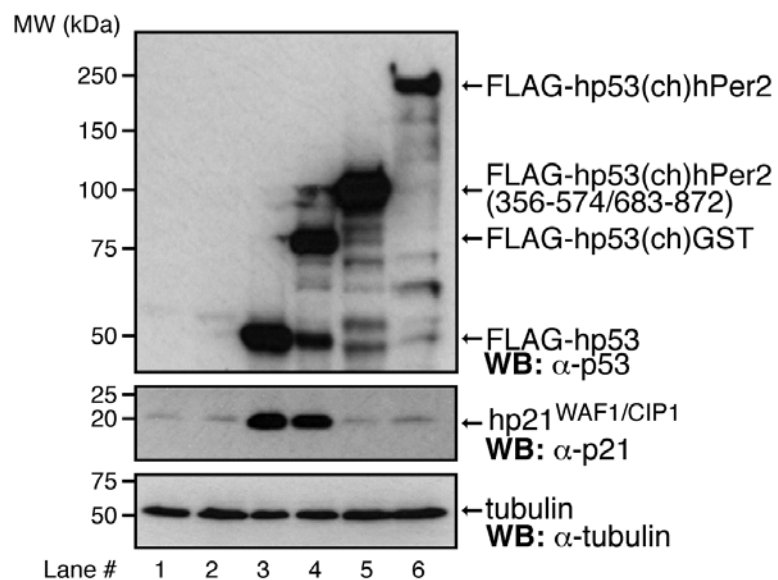

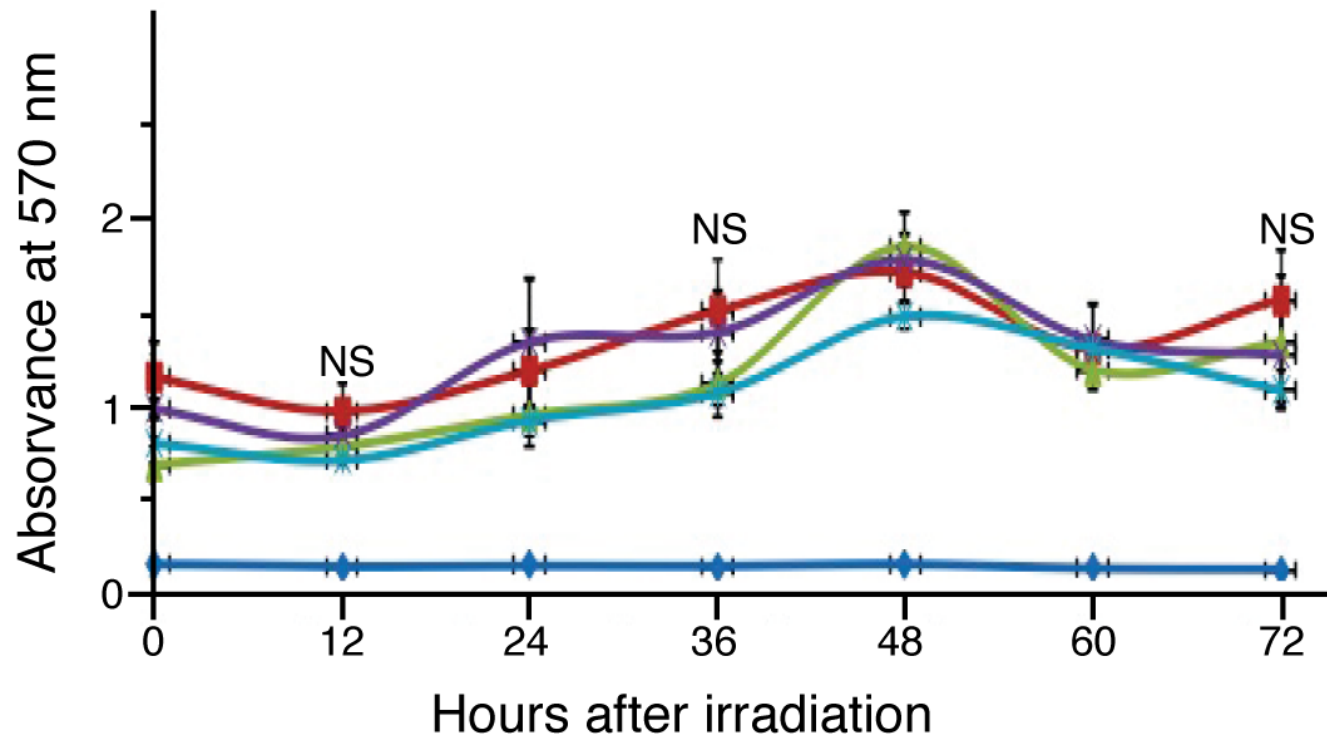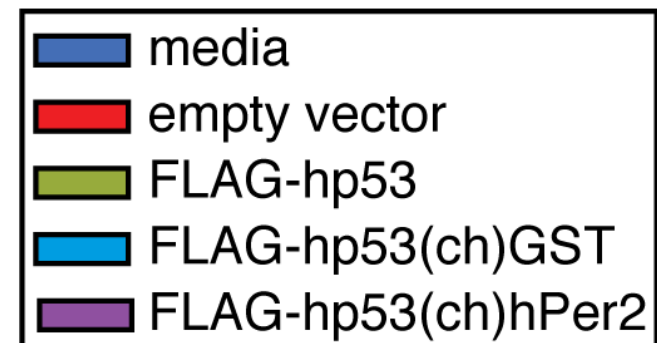

**A.**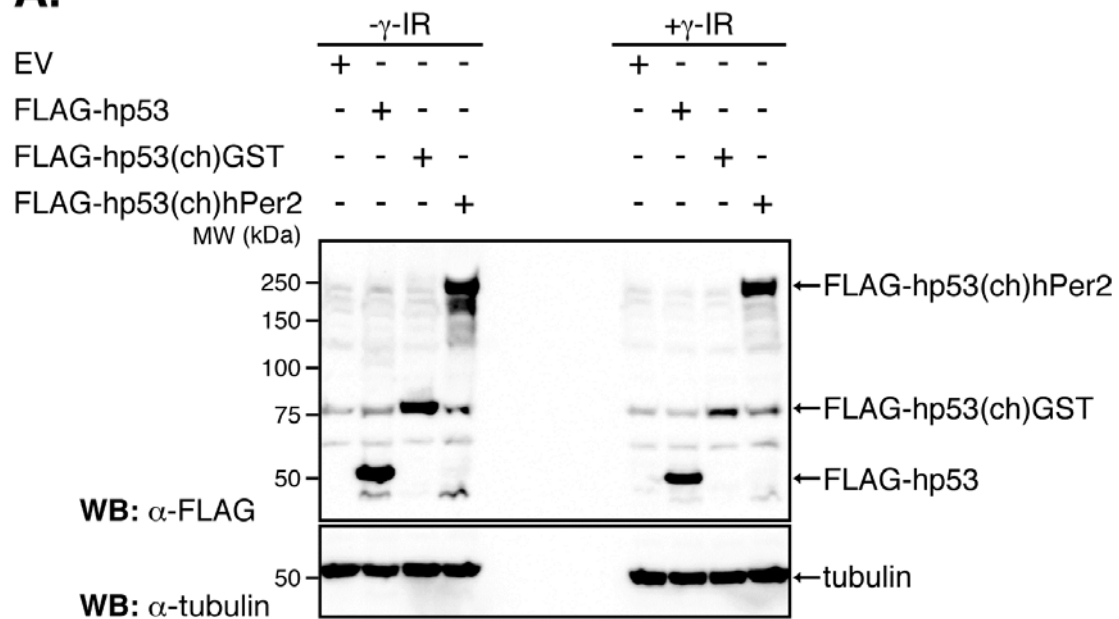**B.**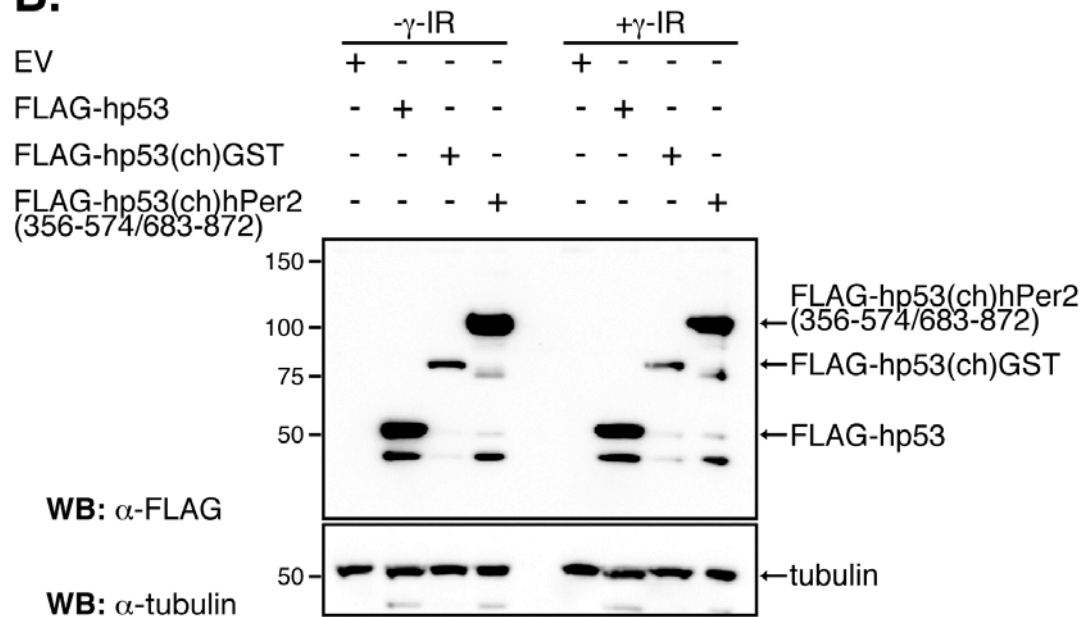

|                    | <u>-<math>\gamma</math>-IR</u> |   |   |   | <u>+<math>\gamma</math>-IR (0.5 Gy)</u> |   |   |   | <u>+<math>\gamma</math>-IR (2.5 Gy)</u> |   |   |   | <u>+<math>\gamma</math>-IR (5 Gy)</u> |   |   |   |
|--------------------|--------------------------------|---|---|---|-----------------------------------------|---|---|---|-----------------------------------------|---|---|---|---------------------------------------|---|---|---|
| EV                 | +                              | - | - | - | +                                       | - | - | - | +                                       | - | - | - | +                                     | - | - | - |
| FLAG-hp53          | -                              | + | - | - | -                                       | + | - | - | -                                       | + | - | - | -                                     | + | - | - |
| FLAG-hp53(ch)GST   | -                              | - | + | - | -                                       | - | + | - | -                                       | - | + | - | -                                     | - | + | - |
| FLAG-hp53(ch)hPer2 | -                              | - | - | + | -                                       | - | - | + | -                                       | - | - | + | -                                     | - | - | + |

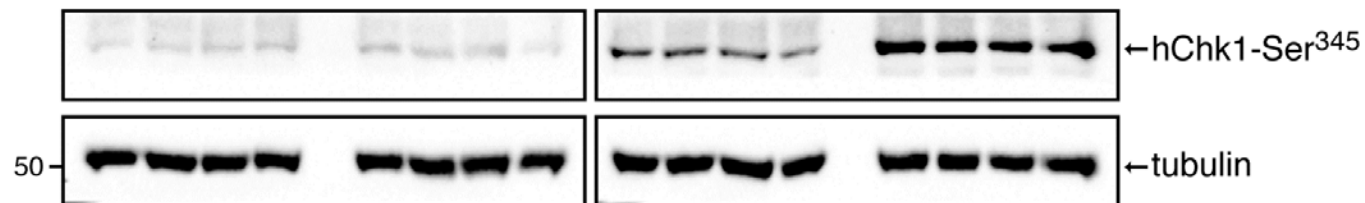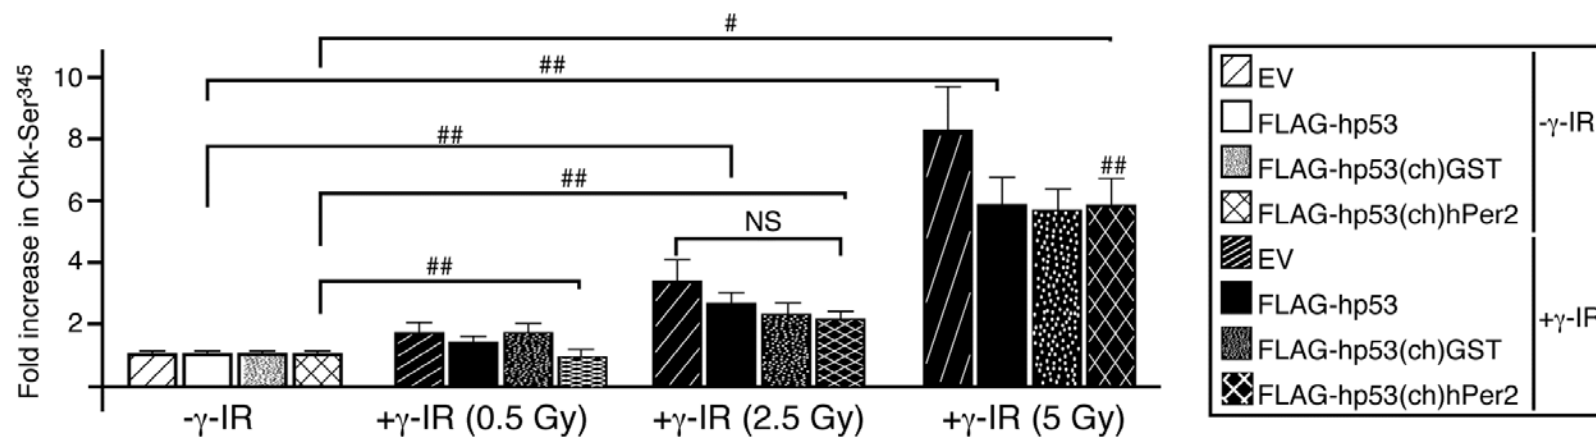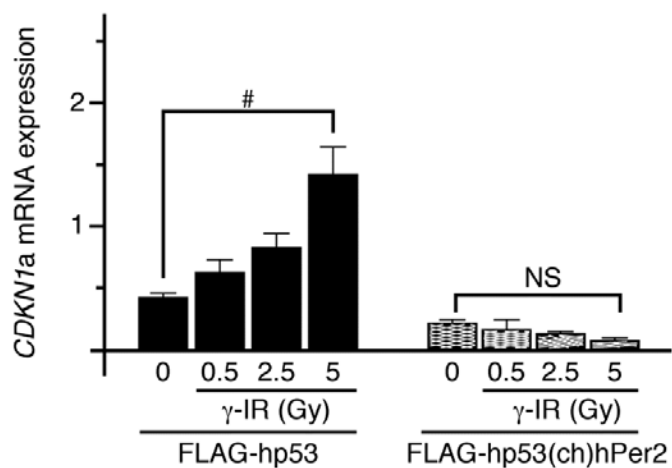

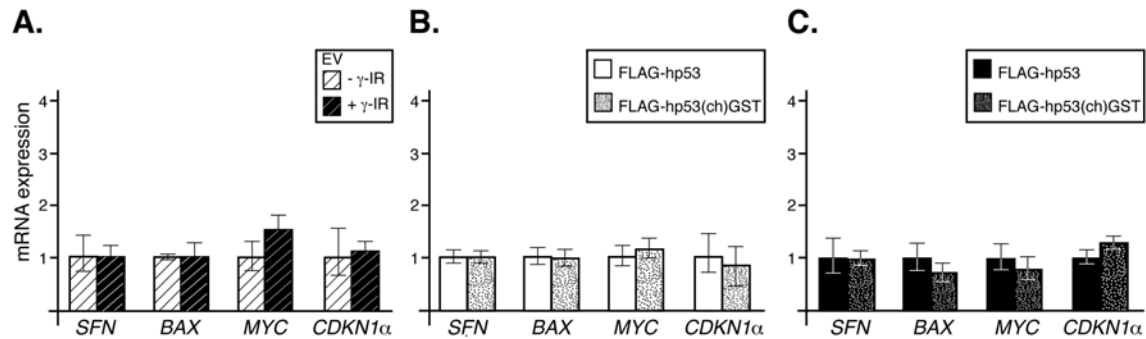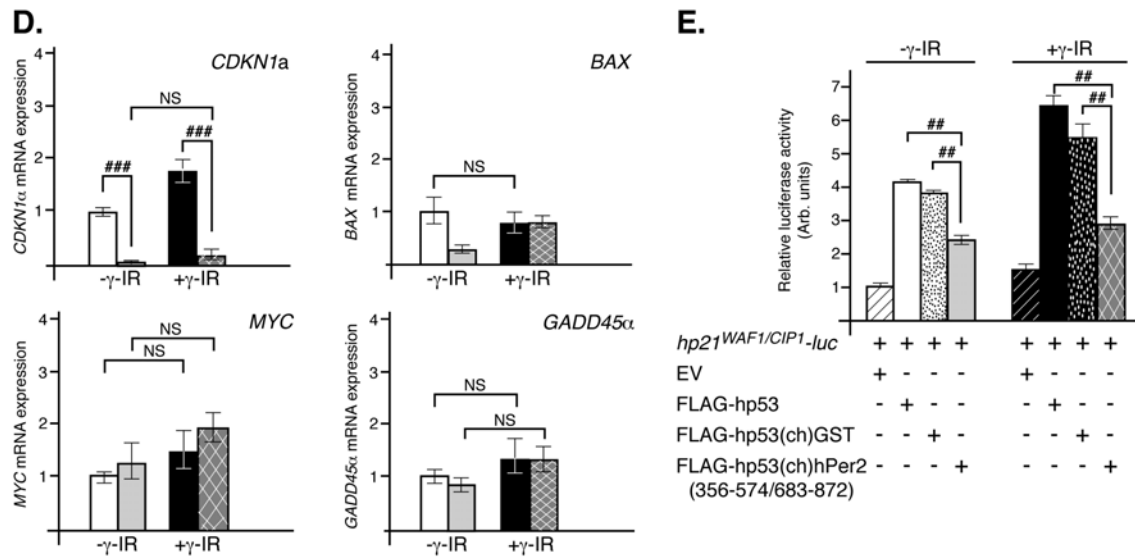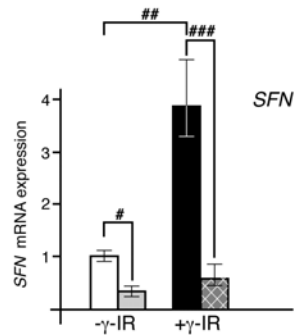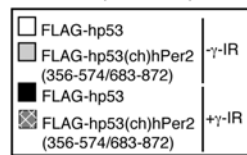

**A.**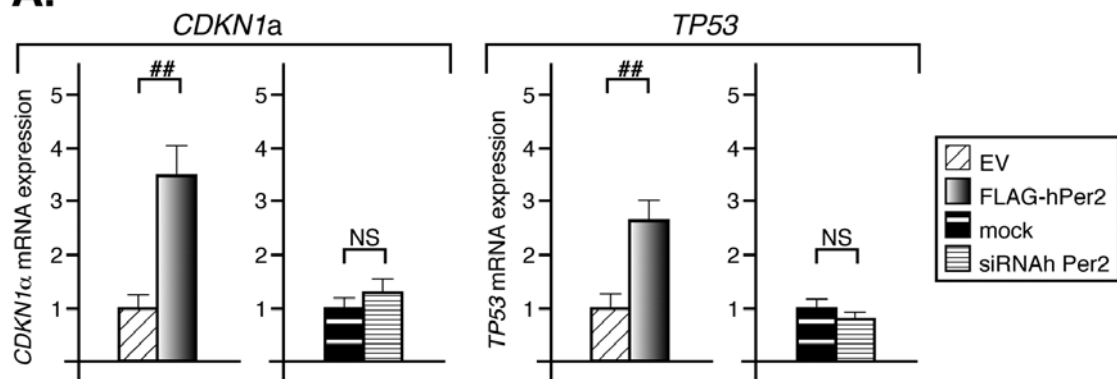**B.**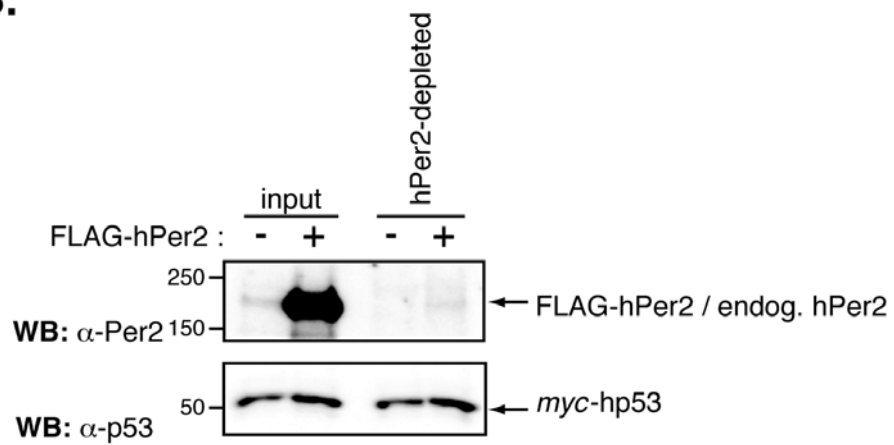**C.**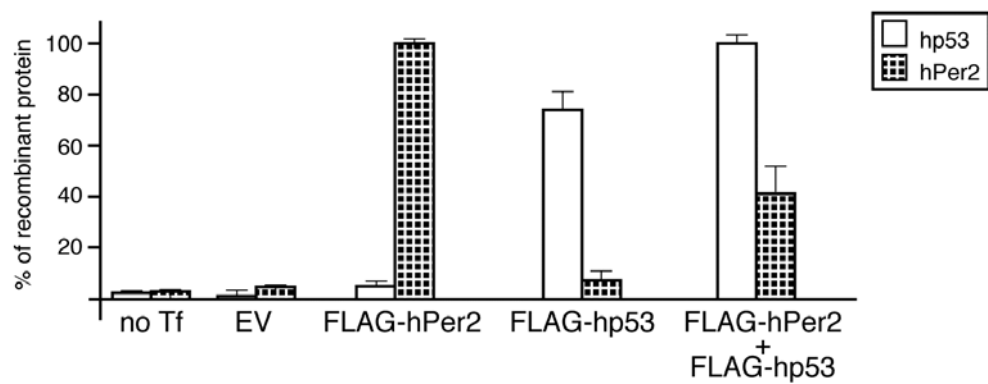

**A.**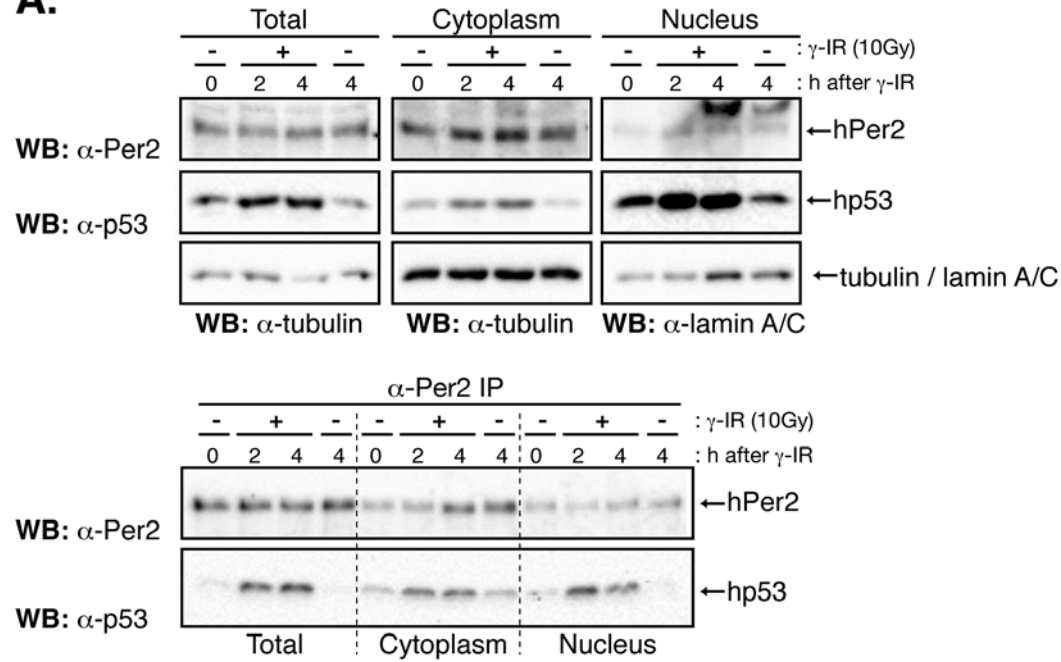**B.**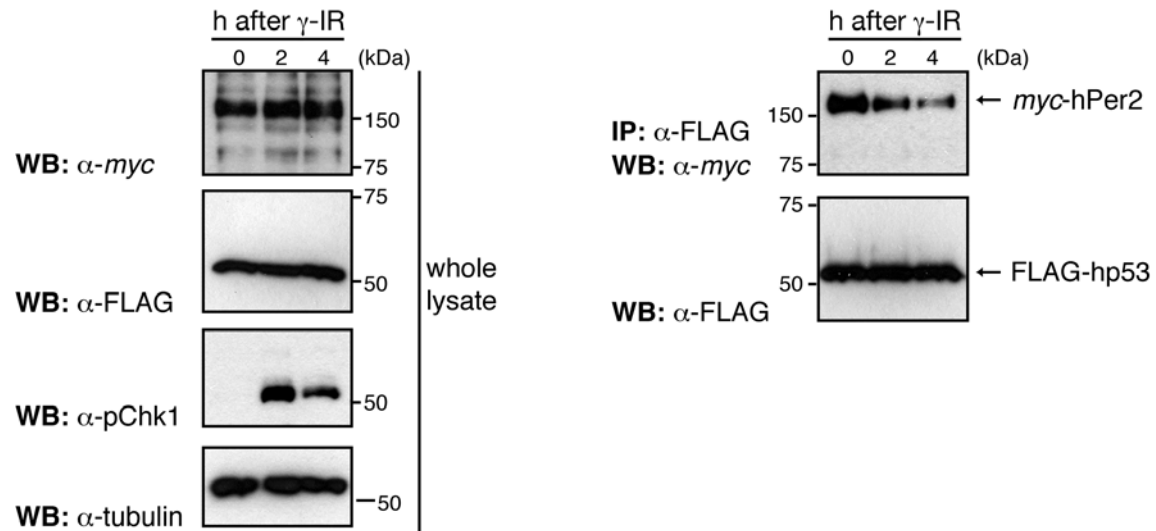

Supplement: supp_E14-05-0994v1_CombinedSupMats.pdf [file supp_E14-05-0994v1_CombinedSupMats.pdf]
